# Supplementary material
Source: Springer Nature journal article supplement (https://www.springermedizin.de/resource/supplementary/12916_2010_369_MOESM6_ESM.pdf/9599806)

**Cross-corr Glucose CPP**

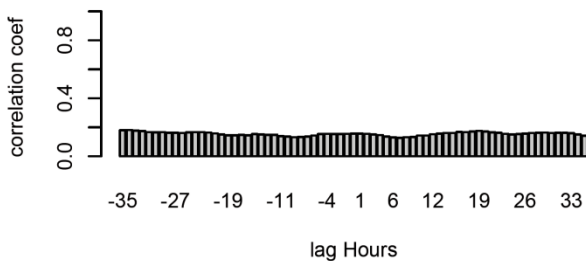

**Cross-corr Lactate CPP**

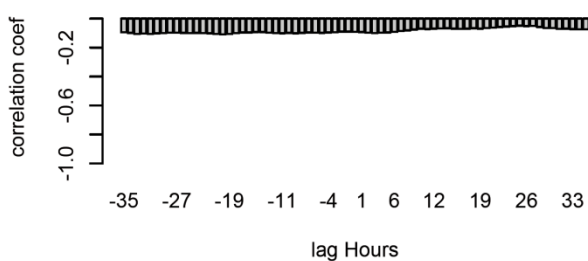

**Cross-corr Pyruvate CPP**

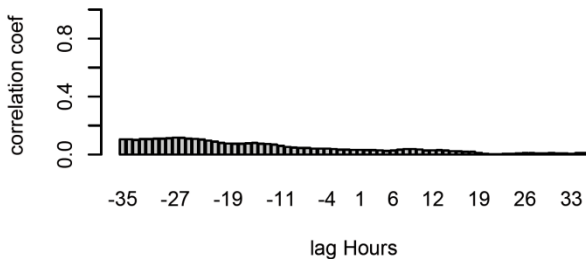

**Cross-corr Glycerol CPP**

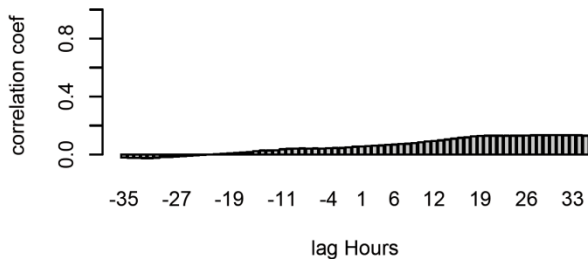

**Cross-corr LP-ratio CPP**

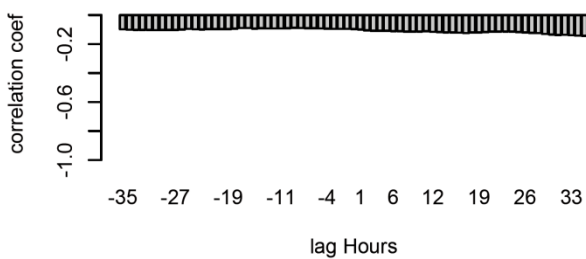

**Cross-corr LG-ratio CPP**

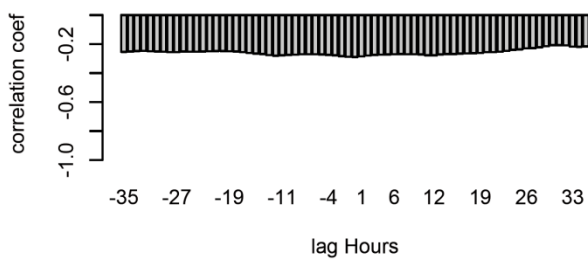

Supplement: MOESM6 [file 9599806]
